# Supplementary figures and images for: The protective effects of beta-mangostin against sodium iodate-induced retinal ROS-mediated apoptosis through MEK/ERK and p53 signaling pathways
Source: Royal Society of Chemistry journal article supplement (doi:10.1039/d3fo03568a), 2023-01-01

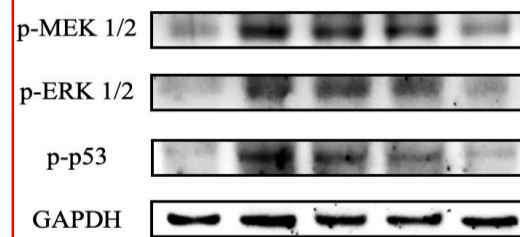

### Repeat1

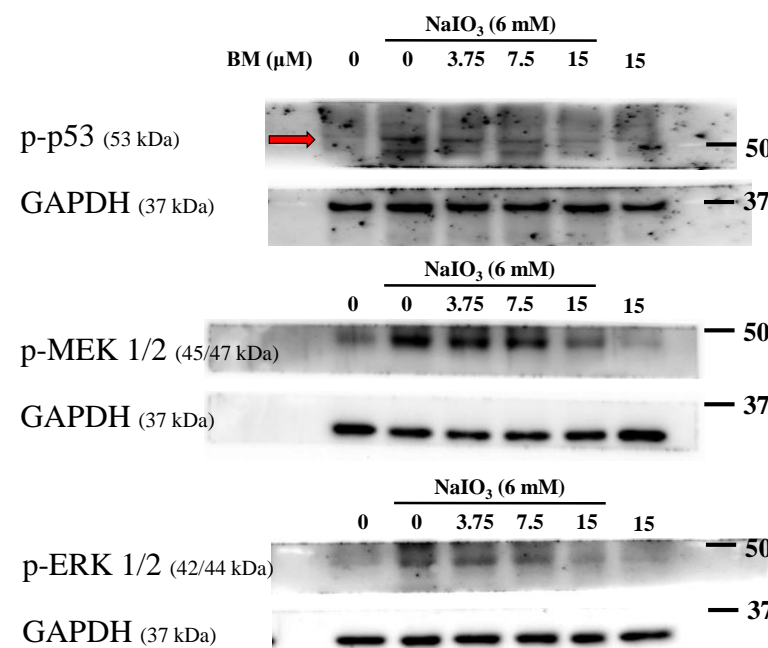

### Repeat2

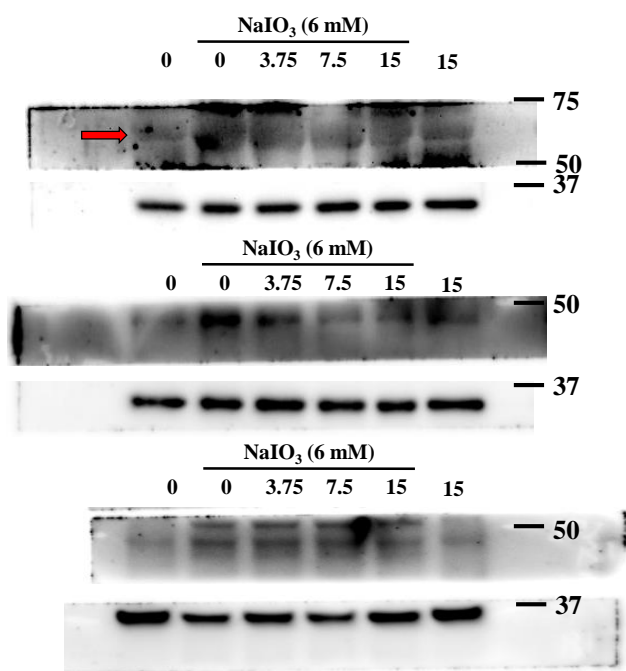

### Repeat3

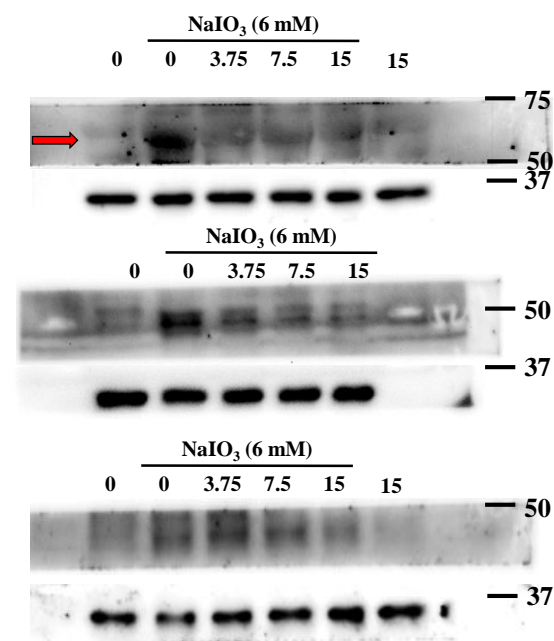

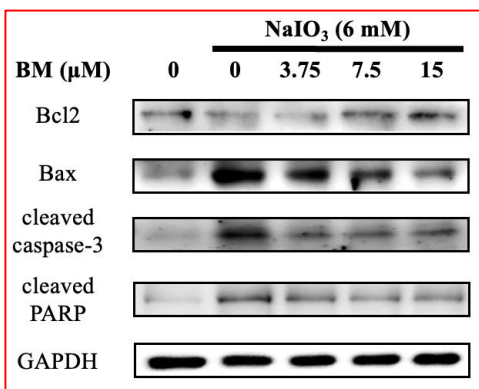

### Repeat1

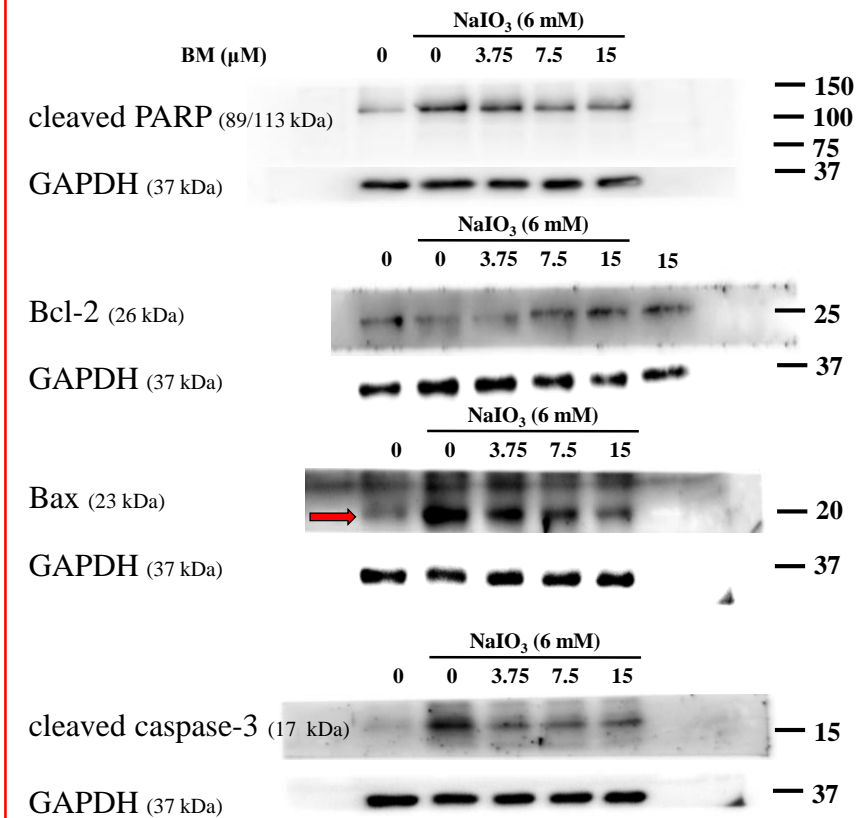

### Repeat2

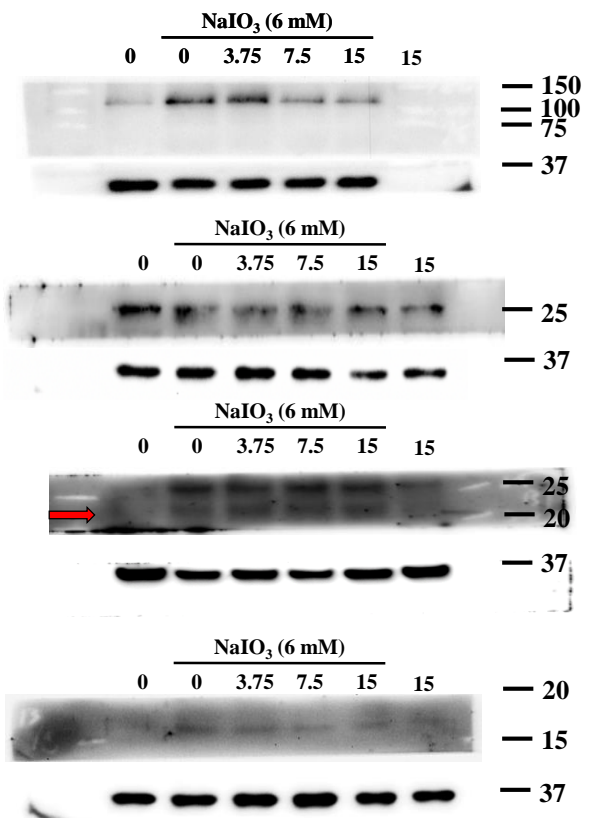

### Repeat3

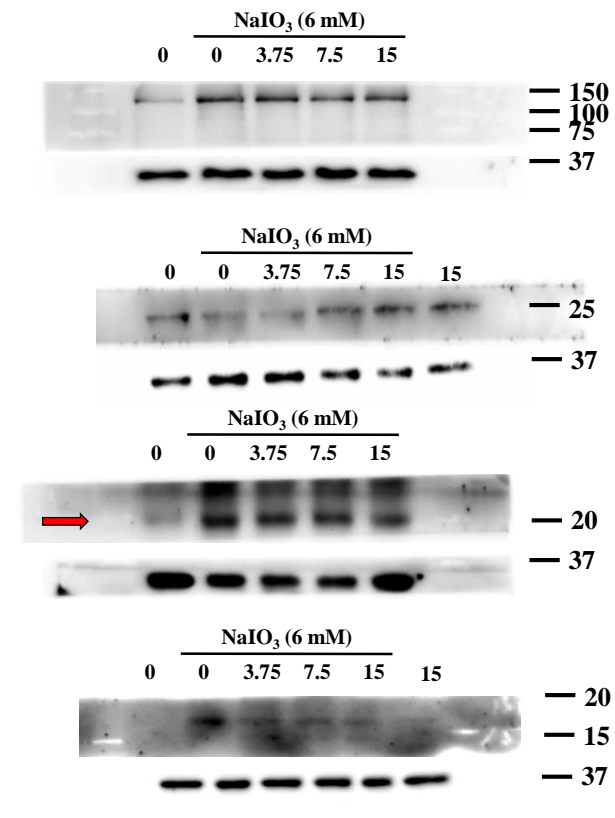

|                          |   |   |   |   |   |
|--------------------------|---|---|---|---|---|
| NaIO <sub>3</sub> (6 mM) | - | + | + | + | + |
| BM (15 μM)               | - | - | + | - | + |
| PD98059 (20 μM)          | - | - | - | + | + |

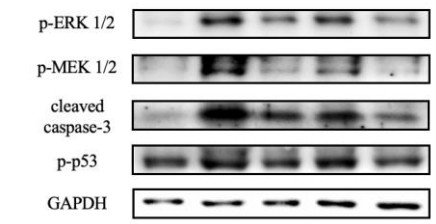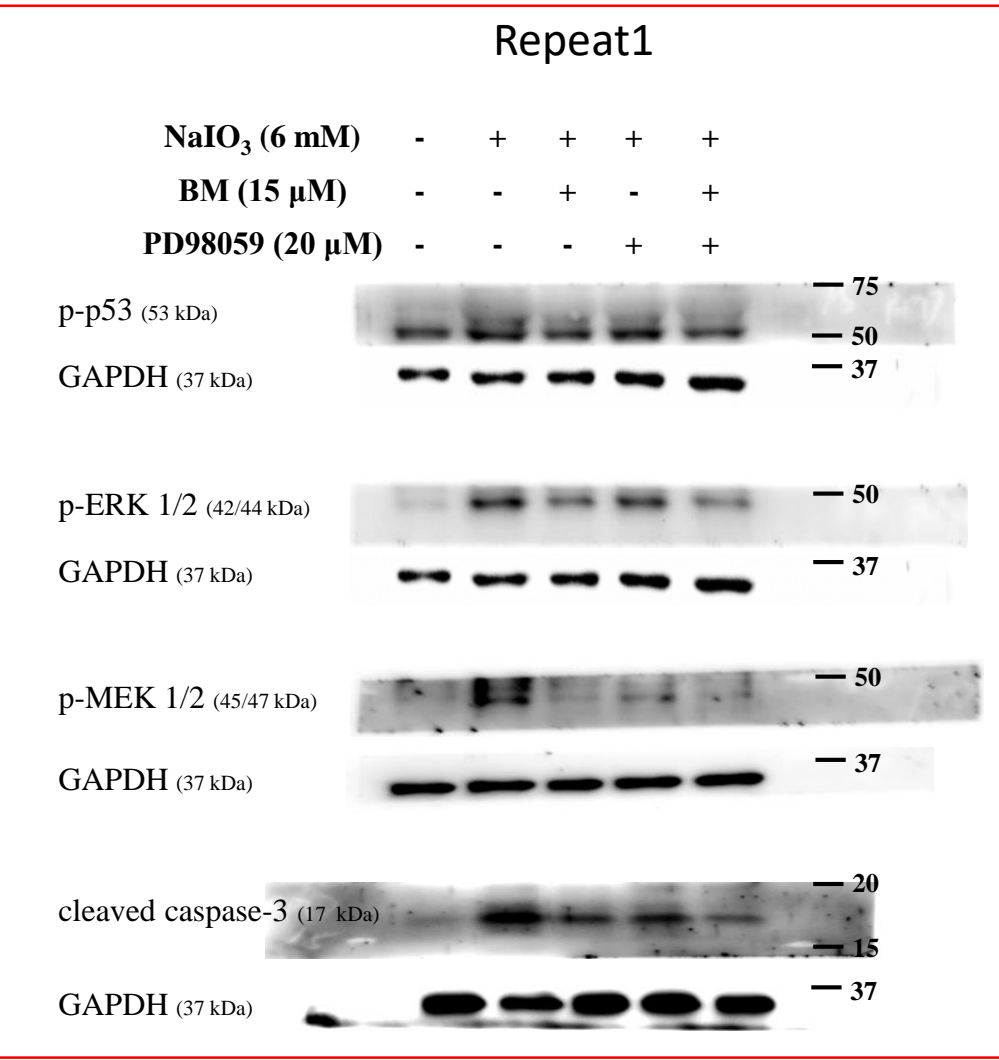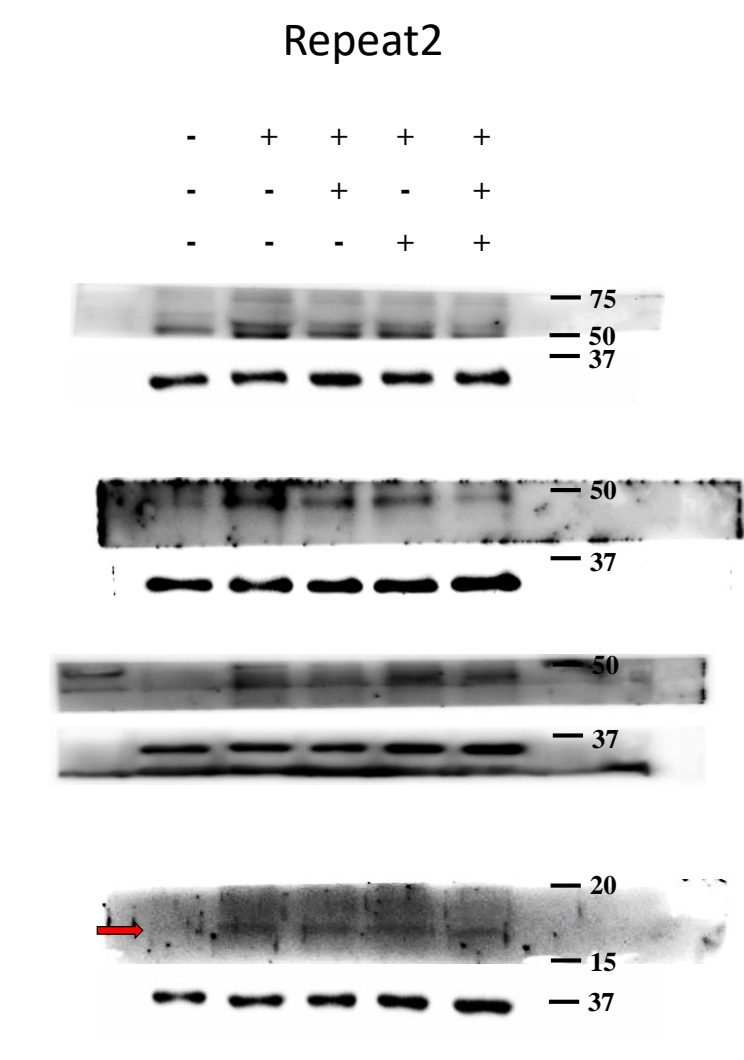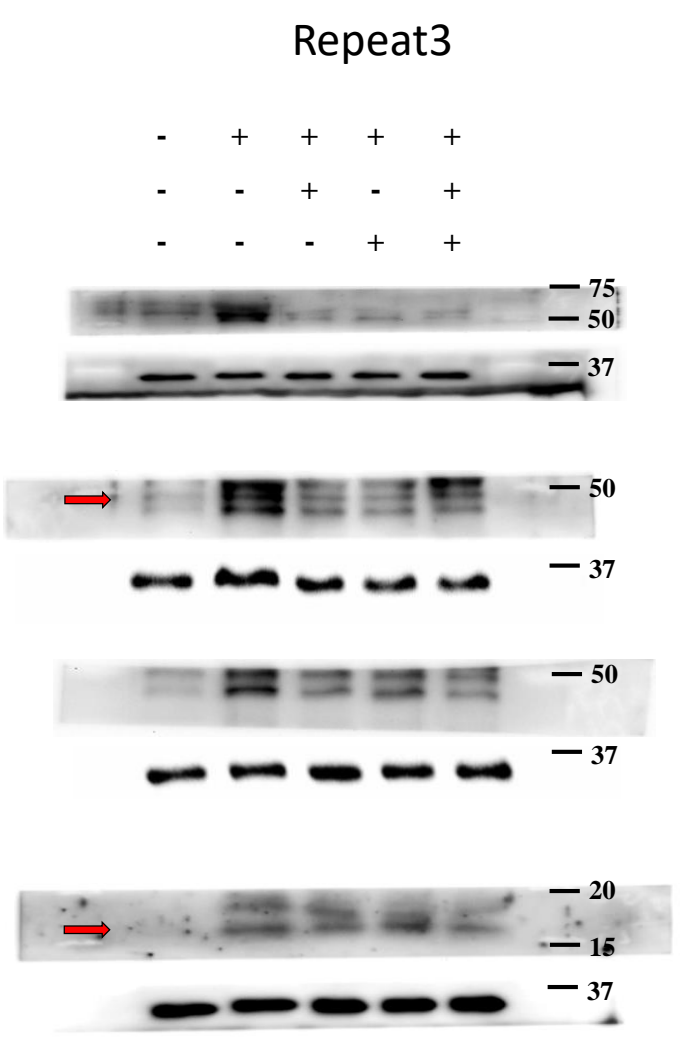

Supplement: d3fo03568a1.pdf [file d3fo03568a1.pdf]
